# Supplementary material for: Tissue Distribution of Doxycycline in Animal Models of Tuberculosis
Source: PubMed Central journal article supplement (PMC7179585; doi:10.1128/aac.02479-19), 2020-04-21
Supplement: AAC.02479-19-s0001.pdf [file AAC.02479-19-s0001.pdf]

- DOXY chow 2000 ppm Lot 1
- DOXY chow 2000 ppm Lot 2
- ▲ DOXY chow 2000 ppm Lot 3

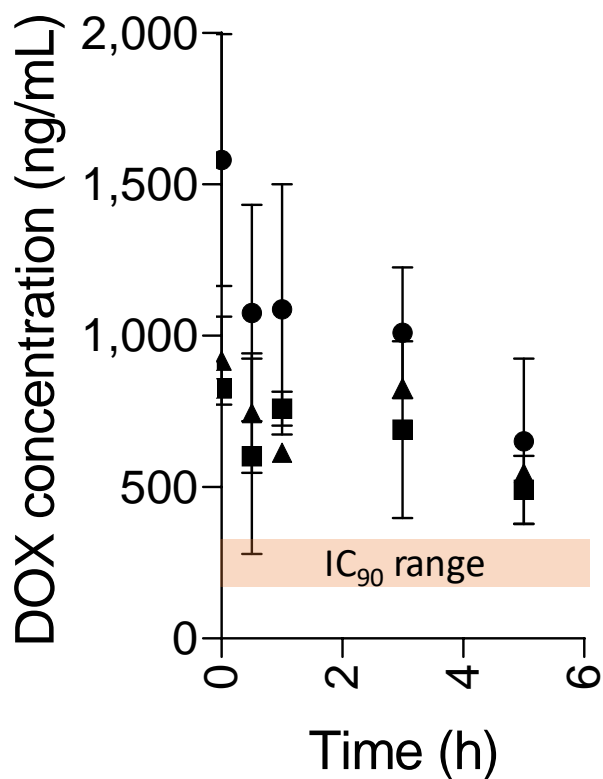

**Supplemental Figure 1.** Plasma pharmacokinetics of DOX in mice receiving three different batches of 2,000 ppm DOX in standard diet for 7 days. Mean values and standard deviations (error bars) are shown for  $n = 4$  mice per group. The orange shaded window indicates the range of in vitro DOX  $IC_{90}$ , or concentration that inhibit 90% of bacterial growth for the three reporter strains shown in Figure 1.

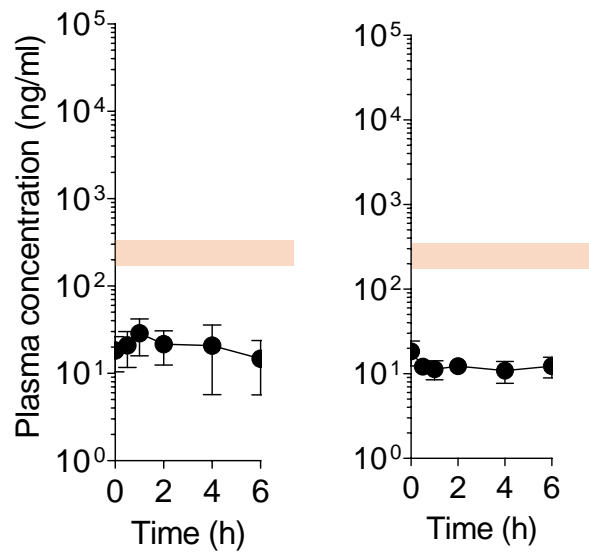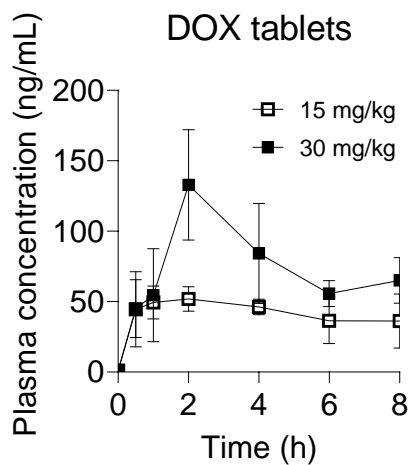

**Supplemental Figure 2. (A)** Plasma pharmacokinetics of DOX in rabbits receiving 200 and 400 ppm DOX in standard chow for 7 days. The orange shaded window indicates the range of in vitro DOX IC<sub>90</sub>, or concentration that inhibit 90% of bacterial growth for the three reporter strains shown in Figure 1. Mean values and standard deviations (error bars) are shown for n = 3 rabbits per dosing group. **(B)** Plasma pharmacokinetics of DOX in rabbits receiving a single DOX dose in the form of pills at approximately 15 or 30 mg/kg. Mean values and standard deviations (error bars) are shown for n = 4 rabbits per dosing group.

**SUPPLEMENTAI TABLE****Table S1.** Actual versus target DOX content of 2,000 ppm chow lots

| Manufacturer | Lot number     | Actual concentration |             |         | Target concentration (ng/g) | % difference |
|--------------|----------------|----------------------|-------------|---------|-----------------------------|--------------|
|              |                | Replicate 1          | Replicate 2 | Average |                             |              |
| Purina       | 17041105Hs5.Oi | 1620000              | 1600000     | 1610000 | 2000000                     | -24.2%       |
| Purina       | 17052302Hs5.Oi | 2140000              | 1850000     | 1995000 | 2000000                     | -0.3%        |
| Purina       | 17030311HS5.Oi | 2210000              | 1920000     | 2065000 | 2000000                     | 3.1%         |
